# Supplementary material
Source: MDPI journal article supplement (https://www.mdpi.com/2073-4344/12/10/1094)
Supplement: s1 [file s1]

## Supplementary data

1. **Table S1.** Purification of wild-type and mutant 3 $\alpha$ -HSD/CRs
2. **Table S2.** The  $T_m$  values and protein tryptophan intrinsic fluorescence of wild-type and mutant 3 $\alpha$ -HSD/CRs.
3. **Table S3.** Oligonucleotide primers used for site-directed mutagenesis.
4. **Figure S1. The SDS-PAGE analysis of mutant 3 $\alpha$ -HSD/CR expressed in *E. coli* BL21(DE3).** The expression and purification of I13K mutant. The molecular mass marker (kDa; M). Lanes 1 and 2, total proteins of BL21 containing I13K mutant in the absence and presence of IPTG induction, respectively. Lane 3 and 4, supernatant and pellet after cell lysis by sonication. Lanes 5, elution fractions from His-bind Ni-NTA affinity column in absence of imidazole. Lanes 6-12, elution fractions from His-bind Ni-NTA affinity column in presence of 0, 50, 50, 100, 200, 300, and 300 mM imidazole, respectively. Fractions of lanes 10-12 are collected for dialysis.
5. **Figure S2. Molecular docking analysis of NAD<sup>+</sup> and NMN<sup>+</sup> for wild-type and mutant 3 $\alpha$ -HSD/CRs.** The NAD<sup>+</sup> bound binary complex of wild-type 3 $\alpha$ -HSD/CR is from the crystal structure (pdb:1fk8). The three-dimensional diagrams display the docking result for the interaction of wild-type and mutants of T11A, T11K, T11R, I13A, I13K, I13R, D41I, D41Q, A70I, A70K, A70Q, I112A, and I112K 3 $\alpha$ -HSD/CRs with NAD<sup>+</sup> or NMN<sup>+</sup>, respectively. The two-dimensional diagrams show the interactions of the amino acid residues in the binding pocket of enzymes to NAD<sup>+</sup> or NMN<sup>+</sup>. The types of interactions are indicated by the colors of residues indicate and bond distances (Å) are shown on each interaction.

**Table S1. Purification of wild-type and mutant 3 $\alpha$ -HSD/CRs<sup>a</sup>**

| Enzyme                         | WT   | T11A | T11K | T11R | I13A | I13K | I13K <sup>b</sup> | I13R | I13R <sup>b</sup> | D41I | D41Q | D41Q <sup>b</sup> | A70I | A70I <sup>b</sup> | A70Q | A70K <sup>b</sup> | I112A | I112K |
|--------------------------------|------|------|------|------|------|------|-------------------|------|-------------------|------|------|-------------------|------|-------------------|------|-------------------|-------|-------|
| Wet pellet<br>(g)              | 2.4  | 3.0  | 3.8  | 2.6  | 3.2  | 2.7  | 2.5               | 3.6  | 3.6               | 1.9  | 2.7  | 3.6               | 3.3  | 3.8               | 1.7  | 3.6               | 2.9   | 2.4   |
| Yield<br>(mg)                  | 38.8 | 6.7  | 11.4 | 10.3 | 13.8 | 4.1  | 25.9              | 2.4  | 35.6              | 4.3  | 1.7  | 10.0              | 0.9  | 26.7              | 17.7 | 59.1              | 13.9  | 7.3   |
| Inclusion<br>body <sup>c</sup> | -    | -    | -    | -    | -    | +    | -                 | +    | -                 | +    | +    | +                 | +    | +                 | -    | -                 | -     | -     |

<sup>a</sup>3 $\alpha$ -HSD/CRs are overexpressed in *E. coli* BL21 in 1 liters LB medium, induced by 0.5 mM IPTG at 37 °C and purified by metal-chelate chromatography. <sup>b</sup> Protein expression induced by IPTG at lower temperatures 14 °C for 14 hrs. <sup>c</sup> -, no inclusion body observed; +, Inclusion body formed.

**Table S2. The T<sub>m</sub> values and protein tryptophan intrinsic fluorescence of wild-type and mutant 3 $\alpha$ -HSD/CRs<sup>a, b</sup>.**

| 3 $\alpha$ -HSD/CR     | WT   | T11A            |                 | T11K            |                 | T11R            |                 | I13A            |                 | I13K            |                 | I13R | D41I | D41Q | A70I            |                 | A70Q | A70K | I112A | I112K           |                 |
|------------------------|------|-----------------|-----------------|-----------------|-----------------|-----------------|-----------------|-----------------|-----------------|-----------------|-----------------|------|------|------|-----------------|-----------------|------|------|-------|-----------------|-----------------|
|                        |      | T <sub>m1</sub> | T <sub>m2</sub> |      |      |      | T <sub>m1</sub> | T <sub>m2</sub> |      |      |       | T <sub>m1</sub> | T <sub>m2</sub> |
| T <sub>m</sub>         | 51.9 | 32.2            | 50.5            | 30.5            | 48.5            | 32.0            | 49.1            | 32.8            | 45.8            | 32.0            | 41.3            | 35.4 | 48.3 | 46.8 | 29.4            | 41.4            | 50.8 | 46.6 | 51.4  | 51.6            | 60.4            |
| $\lambda_{\text{max}}$ | 329  | 329             |                 | 329             |                 | 331             |                 | 329             |                 | 329             |                 | 330  | 336  | 335  | 332             |                 | 329  | 329  | 329   | 329             |                 |
| F <sub>max</sub>       | 529  | 521             |                 | 518             |                 | 506             |                 | 473             |                 | 477             |                 | 522  | 350  | 442  | 492             |                 | 523  | 495  | 546   | 549             |                 |

<sup>a</sup> The T<sub>m</sub> values of wild-type and mutant 3 $\alpha$ -HSD/CRs are obtained from the thermal unfolding by DSF. T<sub>m1</sub> and T<sub>m2</sub> are the midpoint temperatures for the thermal unfolding transition from a native state to an intermediate state and an intermediate state to an unfolded state, respectively. <sup>b</sup> The protein fluorescence spectra of 4  $\mu$ M wild-type and mutant 3 $\alpha$ -HSD/CRs excited at 295 nm, pH 7.5.  $\lambda_{\text{max}}$  and F<sub>max</sub> are the maximum wavelength and intensity, respectively.

**Table S3. Oligonucleotide primers used for site-directed mutagenesis**

| Mutation | Direction | Nucleotide sequence of primer <sup>a</sup>   |
|----------|-----------|----------------------------------------------|
| T11A     | Forward   | 5'-gctggctgcgcc <b>gcc</b> ggcattggtgcg-3'   |
|          | Reverse   | 5'-cgcaccaatgcc <b>ggc</b> ggcgagccgc-3'     |
| T11R     | Forward   | 5'-gctggctgcgcc <b>agggg</b> cattggtgcg-3'   |
|          | Reverse   | 5'-cgcaccaatgcc <b>cct</b> ggcgagccgc-3'     |
| T11K     | Forward   | 5'-gctggctgcgcc <b>aagg</b> gcattggtgcg-3'   |
|          | Reverse   | 5'-cgcaccaatgcc <b>ctt</b> ggcgagccgc-3'     |
| I13A     | Forward   | 5'-ctgcgccaccggc <b>gct</b> ggtgcggctacg-3'  |
|          | Reverse   | 5'-cgtagccgcacc <b>agc</b> gccggtggcgag-3'   |
| I13R     | Forward   | 5'-ctgcgccaccggc <b>aggg</b> ggtgcggctacg-3' |
|          | Reverse   | 5'-cgtagccgcacc <b>cct</b> gccggtggcgag-3'   |
| I13K     | Forward   | 5'-ctgcgccaccggc <b>aagg</b> ggtgcggctacg-3' |
|          | Reverse   | 5'-cgtagccgcacc <b>ctt</b> gccggtggcgag-3'   |
| D41Q     | Forward   | 5'-gaagtgattgcc <b>cag</b> ctctcgacggccg-3'  |
|          | Reverse   | 5'-cggccgtcgagag <b>ctg</b> ggcaatcacttc-3'  |
| D41I     | Forward   | 5'-gaagtgattgcc <b>att</b> ctctcgacggccg-3'  |
|          | Reverse   | 5'-cggccgtcgagag <b>aat</b> ggcaatcacttc-3'  |
| A70I     | Forward   | 5'-ctggtgctgtgc <b>atc</b> ggcctgggaccg-3'   |
|          | Reverse   | 5'-cgggtcccaggcc <b>gat</b> gcacagcaccag-3'  |
| A70Q     | Forward   | 5'-ctggtgctgtgc <b>cagg</b> gcctgggaccg-3'   |
|          | Reverse   | 5'-cgggtcccaggcc <b>ctg</b> gcacagcaccag-3'  |
| A70K     | Forward   | 5'-ctggtgctgtgc <b>aagg</b> gcctgggaccg-3'   |
|          | Reverse   | 5'-cgggtcccaggcc <b>ctt</b> gcacagcaccag-3'  |
| I112A    | Forward   | 5'-gcagccgtcgtc <b>gc</b> tcgtccgtggcttc-3'  |
|          | Reverse   | 5'-gaagccacggacga <b>ggc</b> gacgacggctgc-3' |
| I112K    | Forward   | 5'-gcagccgtcgtc <b>aag</b> tcgtccgtggcttc-3' |
|          | Reverse   | 5'-gaagccacggacga <b>ctt</b> gacgacggctgc-3' |

<sup>a</sup> The boldface codons indicate the mutation on the amino acid residues and the underlined codons indicate the site of the mutation.

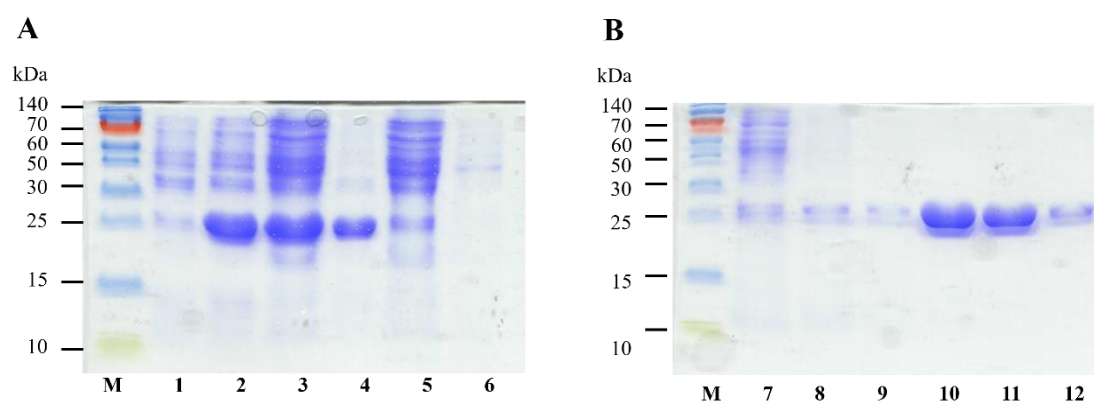

**Figure S1. The SDS-PAGE analysis of mutant 3 $\alpha$ -HSD/CR expressed in *E. coli* BL21(DE3).** The expression and purification of I13K mutant. The molecular mass marker (kDa; M). Lanes 1 and 2, total proteins of BL21 containing I13K mutant in the absence and presence of IPTG induction, respectively. Lane 3 and 4, supernatant and pellet after cell lysis by sonication. Lane 5, elution fractions from His-bind Ni-NTA affinity column in absence of imidazole. Lanes 6-12, elution fractions from His-bind Ni-NTA affinity column in presence of 0, 50, 50, 100, 200, 300, and 300 mM imidazole, respectively. Fractions of lanes 10-12 are collected for dialysis.

**Figure S2.**

WT-  
NAD

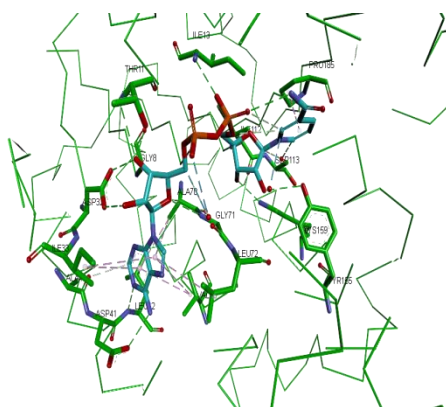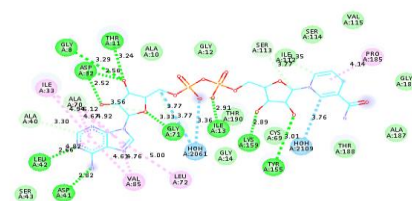

**Interactions**

|                            |                      |
|----------------------------|----------------------|
| van der Waals              | Carbon Hydrogen Bond |
| Water Hydrogen Bond        | Alcohol              |
| Conventional Hydrogen Bond | Pi-Alcohol           |

WT-  
NMN

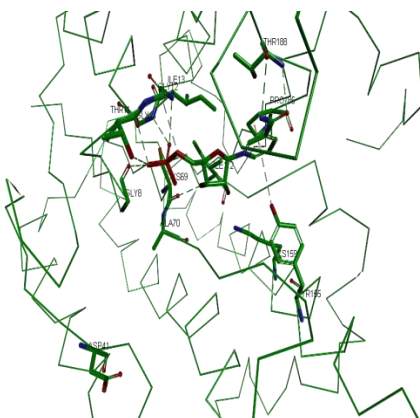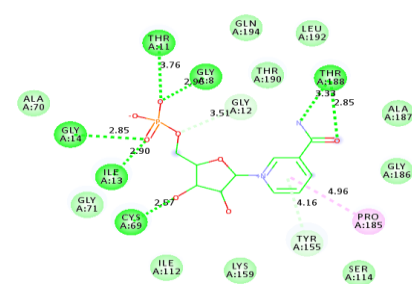

**Interactions**

|                            |                        |
|----------------------------|------------------------|
| van der Waals              | Pi-Donor Hydrogen Bond |
| Conventional Hydrogen Bond | Pi-Alcohol             |
| Carbon Hydrogen Bond       |                        |

T11A-  
NAD

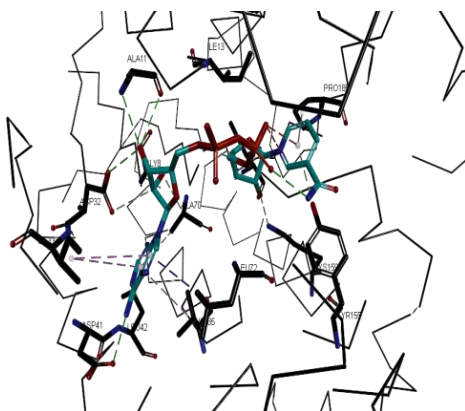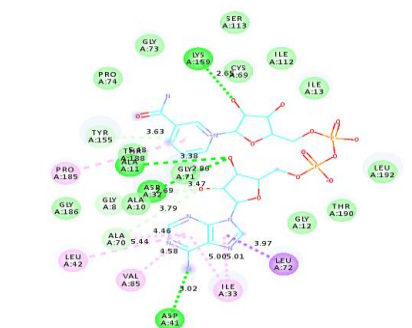

**Interactions**

|                            |                        |
|----------------------------|------------------------|
| van der Waals              | Pi-Donor Hydrogen Bond |
| Conventional Hydrogen Bond | Pi-Sigma               |
| Carbon Hydrogen Bond       | Pi-Alcohol             |

T11A-  
NMN

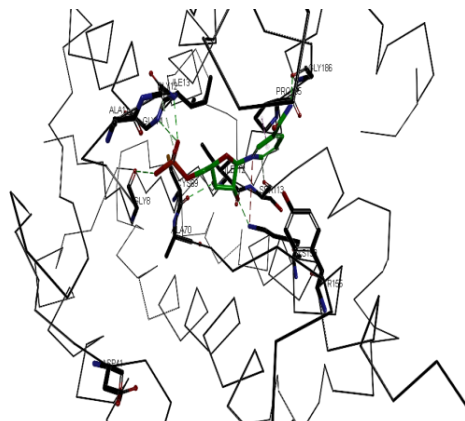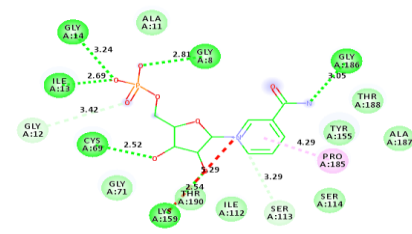

**Interactions**

|                            |                               |
|----------------------------|-------------------------------|
| van der Waals              | Unfavorable Positive-Positive |
| Conventional Hydrogen Bond | Pi-Alcohol                    |
| Carbon Hydrogen Bond       |                               |

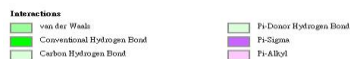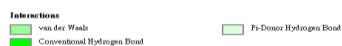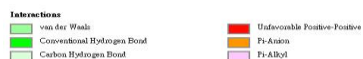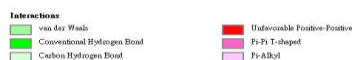

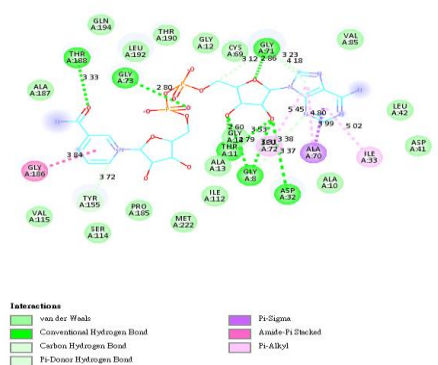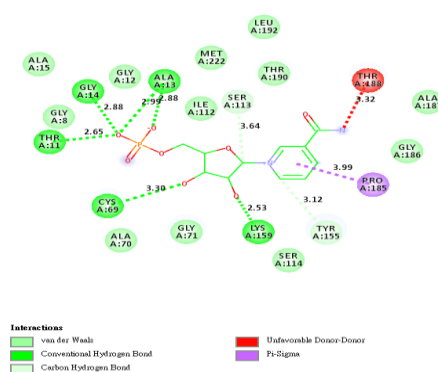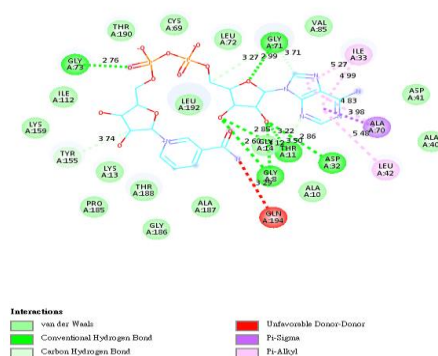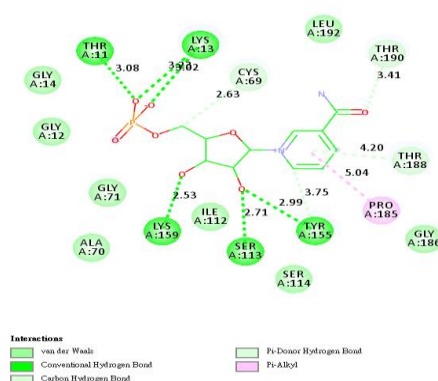



I13R-  
NAD

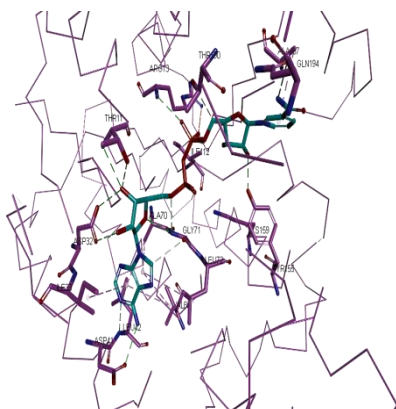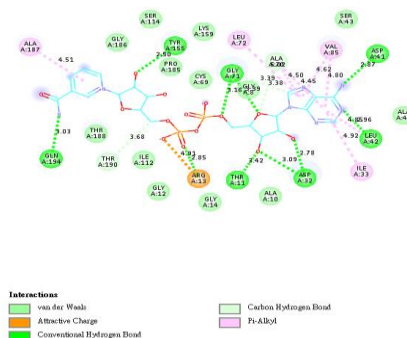

I13R-  
NMN

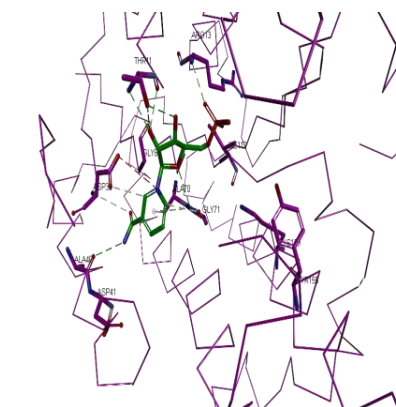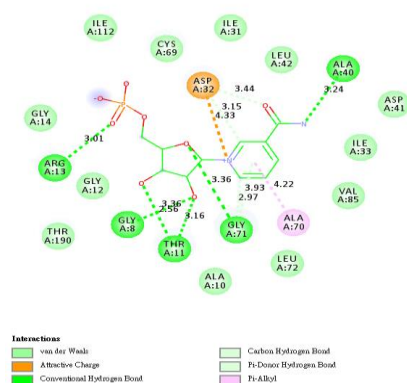

D41I-  
NAD

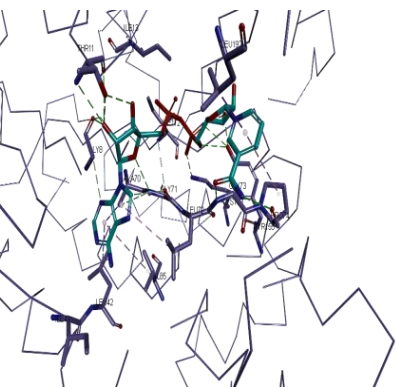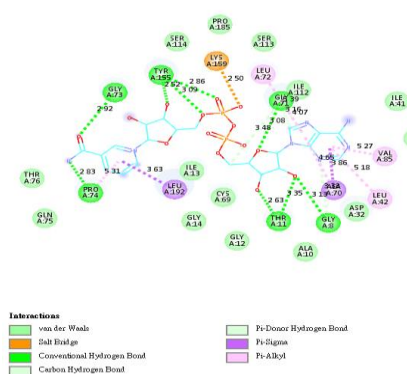

D41I-  
NMN

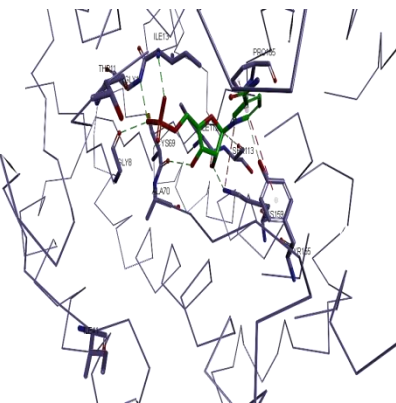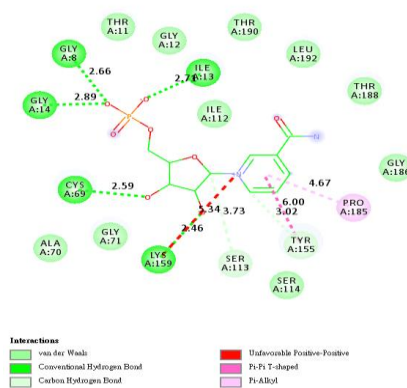

D41Q-  
NAD

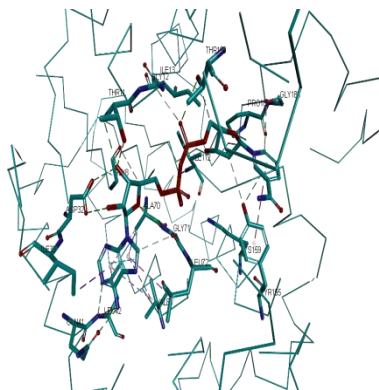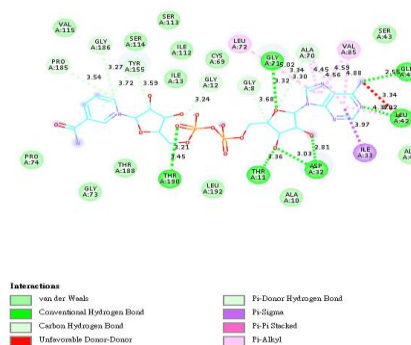

D41Q-  
NMN

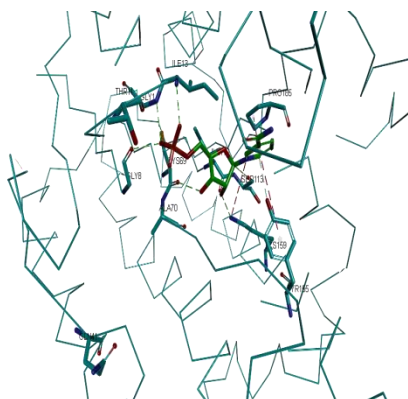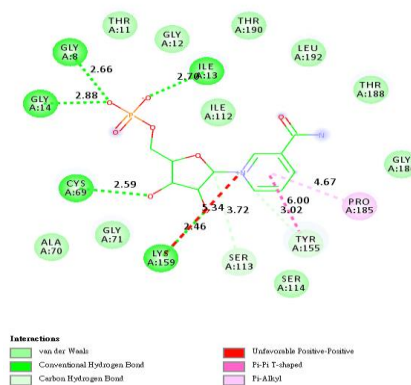

A70I-  
NAD

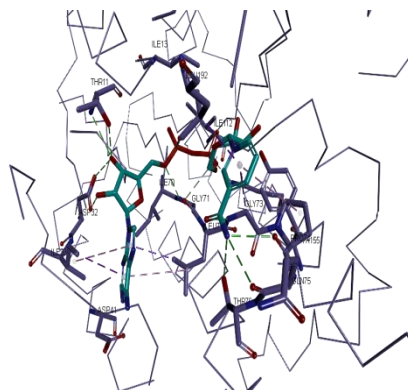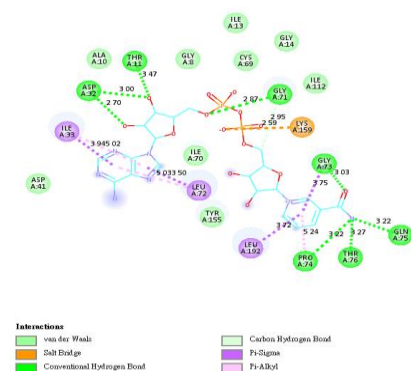

A70I-  
NMN

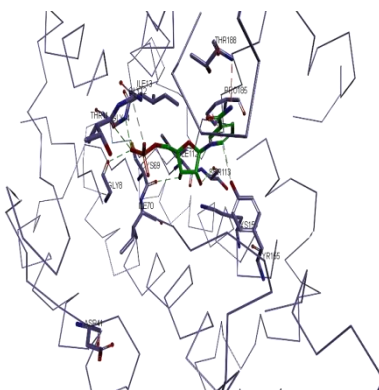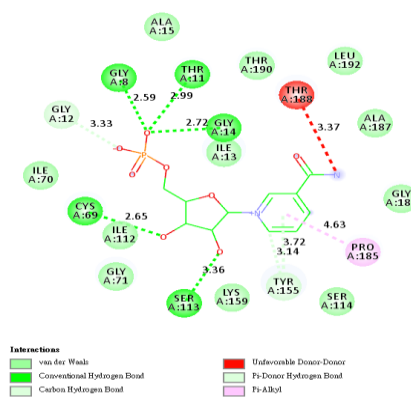

[illegible]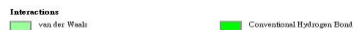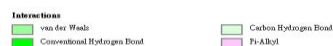

ORTEP diagram of the molecular structure of 2,2,2-trifluoro-4,4,4-trifluoro-1,3-bis(4-fluorophenyl)butane, showing the molecule in the context of the unit cell with thermal ellipsoids at the 50% probability level.

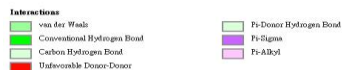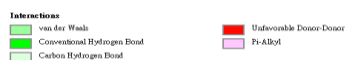

I112A-  
NAD

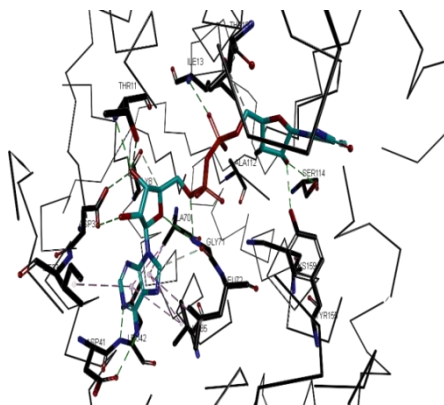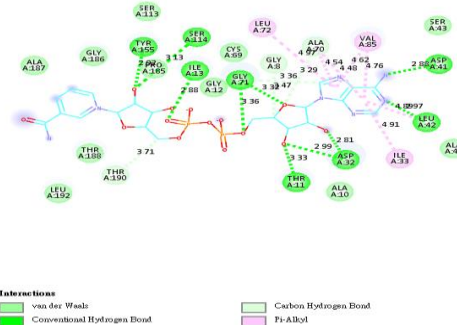

I112A-  
NMN

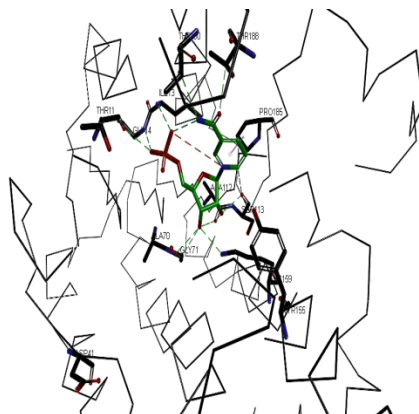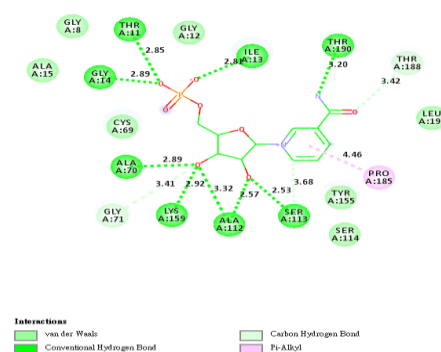

I112K-  
NAD

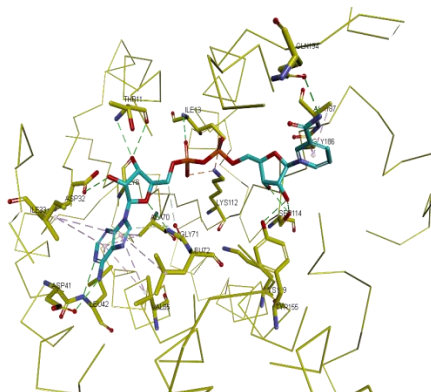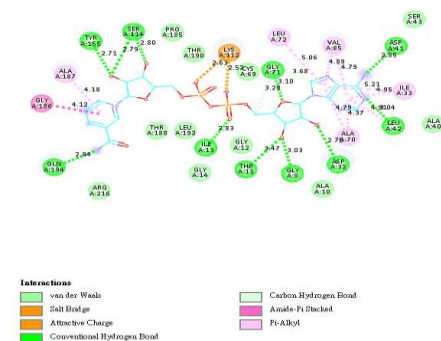

I112K-  
NMN

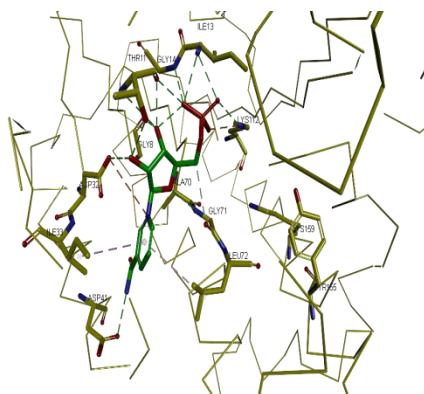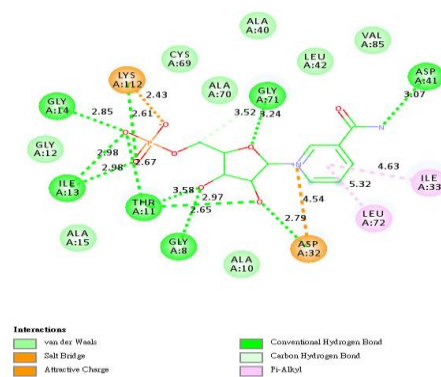

**Figure S2. Molecular docking analysis of NAD<sup>+</sup> and NMN<sup>+</sup> for wild-type and mutant 3 $\alpha$ -HSD/CRs.** The NAD<sup>+</sup> bound binary complex of wild-type 3 $\alpha$ -HSD/CR is from the crystal structure (pdb:1fk8). The three-dimensional diagrams display the docking result for the interaction of wild-type and mutants of T11A, T11K, T11R, I13A, I13K, I13R, D41I, D41Q, A70I, A70K, A70Q, I112A, and I112K 3 $\alpha$ -HSD/CRs with NAD<sup>+</sup> or NMN<sup>+</sup>, respectively. The two-dimensional diagrams show the interactions of the amino acid residues in the binding pocket of enzymes to NAD<sup>+</sup> or NMN<sup>+</sup>. The types of interactions are indicated by the colors of residues indicate and bond distances (Å) are shown on each interaction.
